# Supplementary material for: Extending Working Lives: A Systematic Review of Healthy Working Life Expectancy at Age 50
Source: Springer Nature journal article supplement (doi:10.1007/s11205-020-02302-1), 2020-02-28
Supplement: MOESM1 [file 17756700]

**Supplementary material**

**Appendix tables**

Appendix table 1: Medline search terms

| **Work related search terms** |
| --- |
| occupation.mp. or Occupations/; employed.mp.; employment/ or employment, supported/ or return to work/ or unemployment/; or workplace/; employment.mp.; unemployed.mp.; unemployment.mp.; retirement/ or exp work/; retire*.mp.; pension.mp. or Pensions/; absenteeism/ or presenteeism/; absenteeism.mp.; presenteeism.mp.; Workers’ Compensation/; incapacity benefit.mp.; "employment and support allowance".mp.; workers compensation.mp.; (long term adj3 sick).mp.; (longterm adj3 sick).mp.; Sick Leave/; sick leave.mp. |
| **Health expectancy search terms** |
| active life expectanc*.mp.; disability free life expectanc*.mp.; disease free life expectanc*.mp.; health* life year*.mp.; health adjusted life expectanc*.mp.; health adjusted life year*.mp.; disability adjusted life expectanc*.mp.; disability adjusted life year*.mp.; dependent life expectanc*.mp.; dependent life year*.mp.; (life expectancy adj3 disabilit*).mp.; health* expectanc*.mp.; work* life expectanc*.mp.; population indicator*.mp.; health* life expectanc*.mp. |
